# Supplementary material for: Implementation of mycorrhizal mechanisms into soil carbon model improves the prediction of long-term processes of plant litter decomposition
Source: Copernicus journal article supplement (doi:10.5194/bg-2021-275), 2021-10-22
Supplement: Supplementary file [file bg-2021-275-AC1-supplement.pdf]

## Supplements:

# Implementation of mycorrhizal mechanisms into soil carbon model improves the prediction of long-term processes of plant litter decomposition

Weilin Huang<sup>1</sup>, Peter M. van Bodegom<sup>1</sup>, Toni Viskari<sup>2</sup>, Jari Liski<sup>2</sup>, and Nadejda A. Soudzilovskaia<sup>1,3</sup>

<sup>1</sup>Environmental Biology, Institute of Environmental Sciences, Leiden University, Einsteinweg 2, 2333CC Leiden, the Netherlands;

<sup>2</sup>Finnish Meteorological Institute, Helsinki, 00101, Finland

<sup>3</sup>Centre for Environmental Sciences, Hasselt University, Martelarenlaan 42, 3500 Hasselt, Belgium

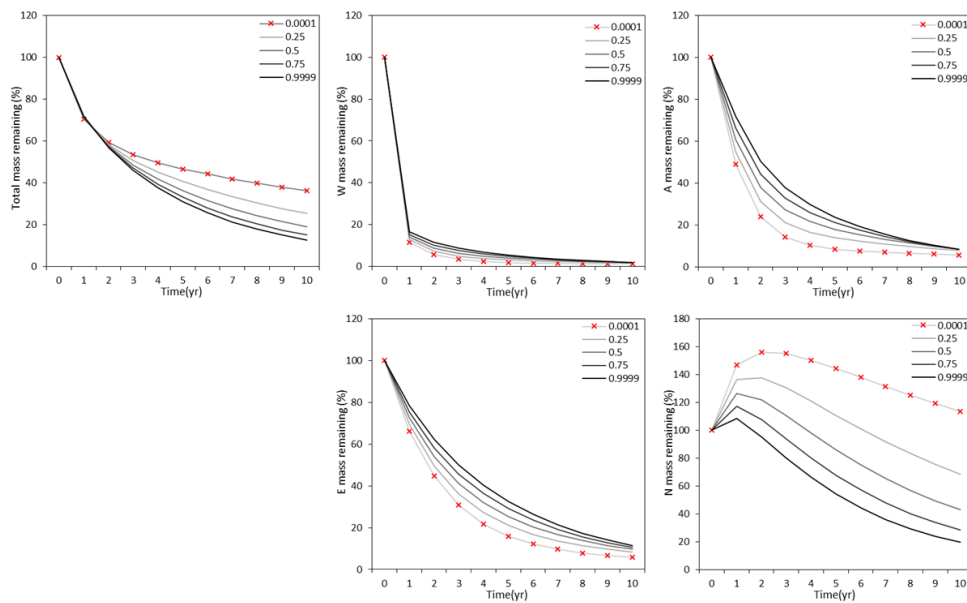

Fig.S1 Dynamics of plant foliage litter decomposition as a result of variation in dominance of AM vegetation (0~1). (a) loss of total carbon mass from root litter, (b),(c), (d) show the dynamics of loss of labile carbon components, being (b)Water-soluble C fraction, (c) Acid hydrolysable C fraction, (d) Ethanol-soluble C fraction, respectively, and (e) dynamics of loss of the recalcitrant (non-hydrolysable) C fraction (N fraction). The initial WAEN composition of decomposition material is 25%-W, 45%-A, 12%-E, and 18%N (typical for plant foliage).

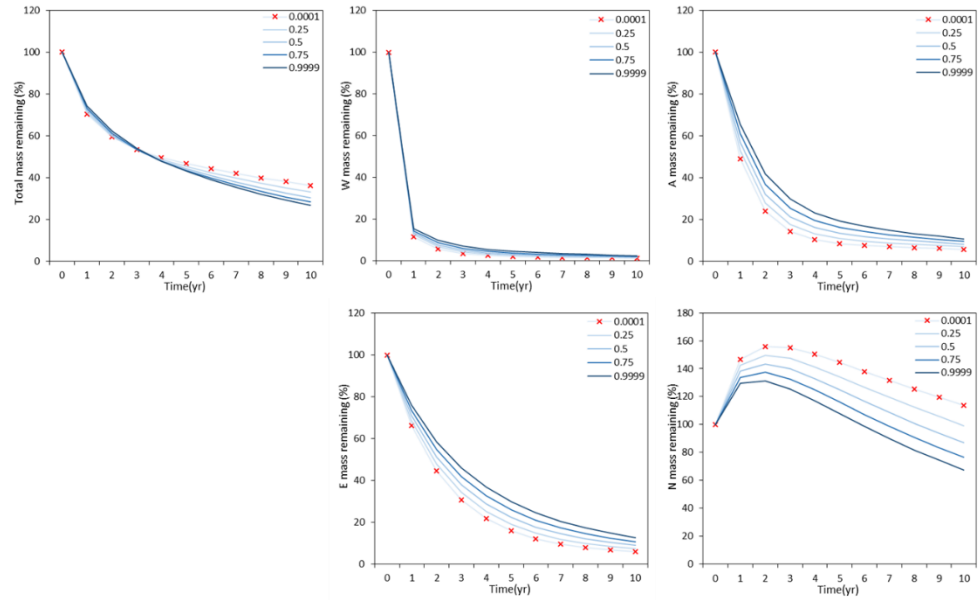

Fig.S2 Dynamics of plant foliage litter decomposition as a result of variation in dominance of EM vegetation (0~1). (a) loss of total carbon mass from root litter, (b), (c), and (d) show the dynamics of loss of labile carbon components, being (b) Water-soluble C fraction, (c) Acid hydrolysable C fraction, (d) Ethanol-soluble C fraction, respectively, and (e) dynamics of loss of recalcitrant (non-hydrolysable) C fraction (N fraction). The initial WAEN composition of decomposition material is 25%-W, 45%-A, 12%-E, and 18%N (typical for plant foliage).
